# Supplementary material for: Merging microarray data from separate breast cancer studies provides a robust prognostic test
Source: Springer Nature journal article supplement (doi:10.1186/1471-2105-9-125), 2008-02-27

# Choosing the size of the signature

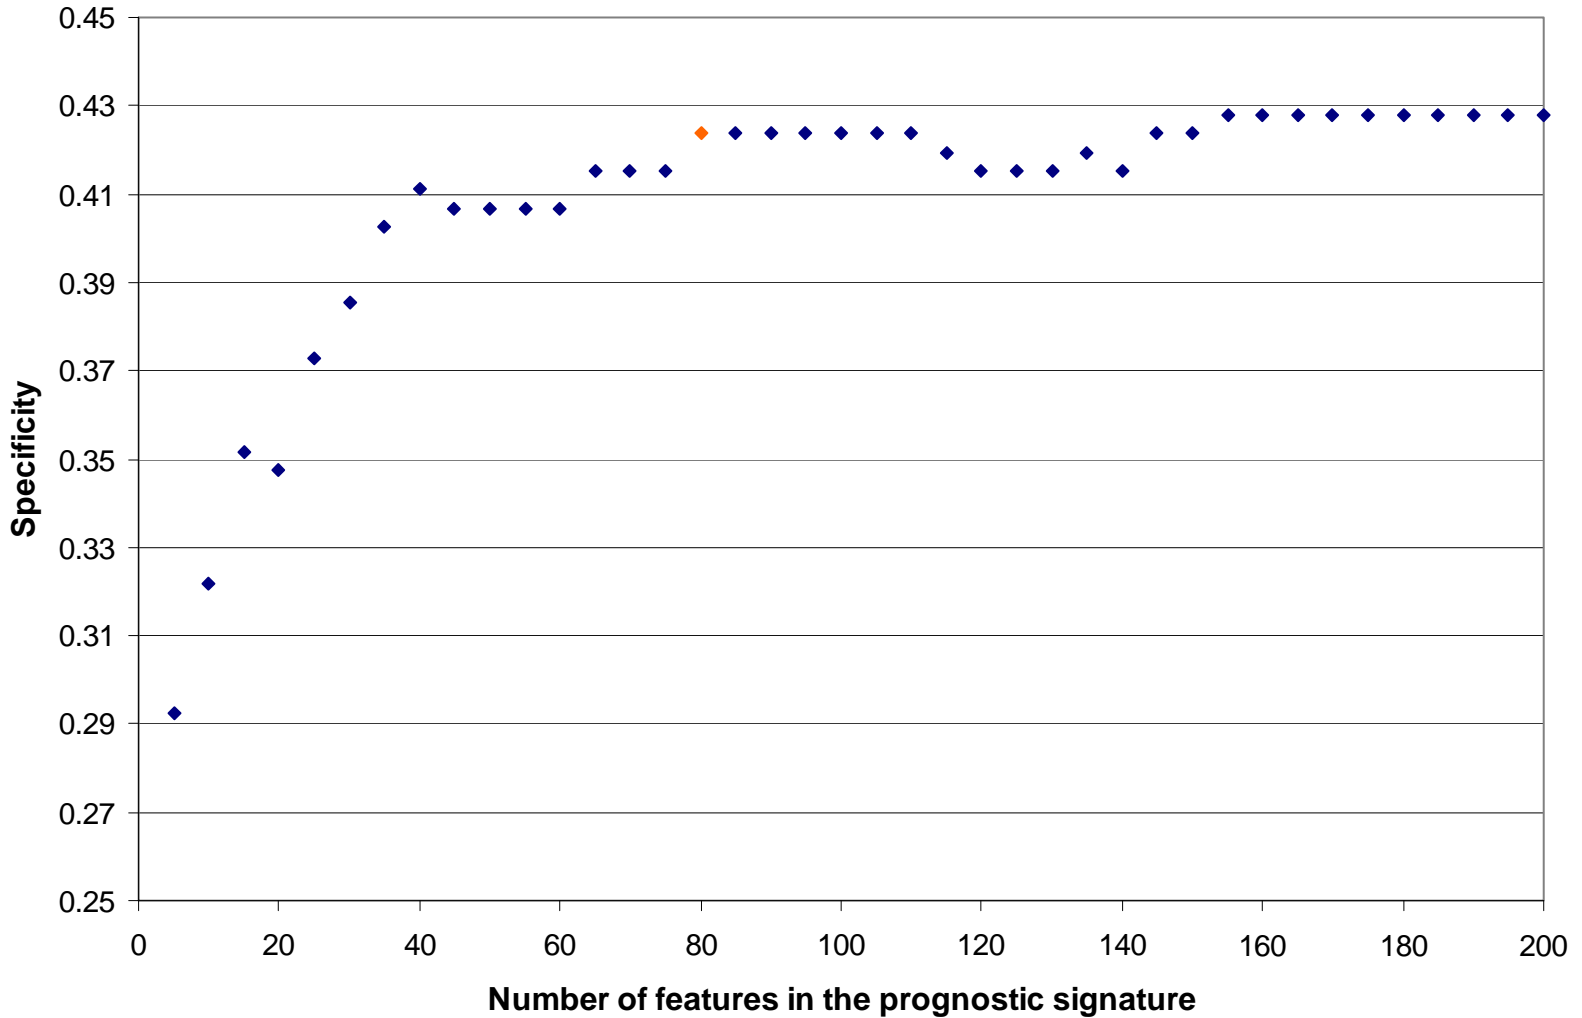

Supplement: 12859_2007_2110_MOESM4_ESM.pdf [file 12859_2007_2110_MOESM4_ESM.pdf]
