# Supplementary material for: Merging microarray data from separate breast cancer studies provides a robust prognostic test
Source: Springer Nature journal article supplement (doi:10.1186/1471-2105-9-125), 2008-02-27
Supplement: 12859_2007_2110_MOESM6_ESM.pdf [file 12859_2007_2110_MOESM6_ESM.pdf]

Prognostic Signature from Integrated Data

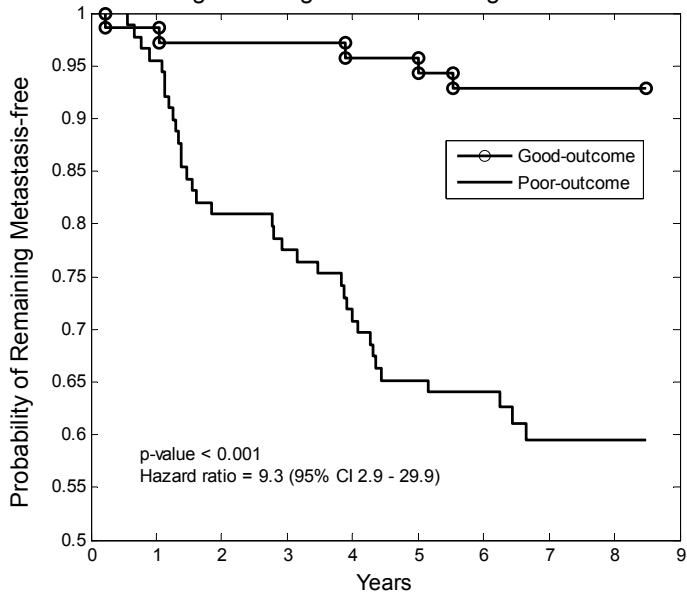

(A)

Prognostic Signature from Wang Data

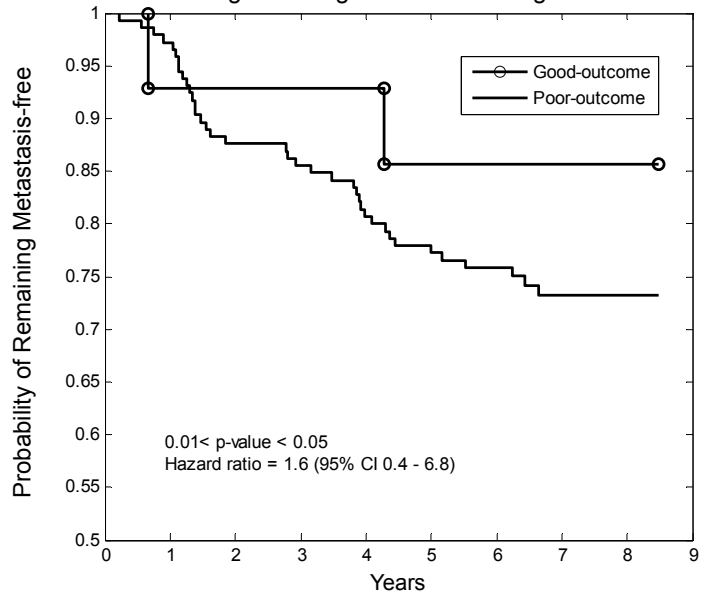

(B)
